# Supplementary material
Source: ML conference proceedings conference paper supplement (https://openreview.net/forum?id=VqAX9Lzdqv)
Supplement: supplementary_material [file attachment]

## FruitBot

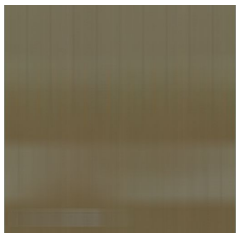

Skill 0

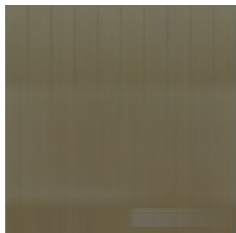

Skill 1

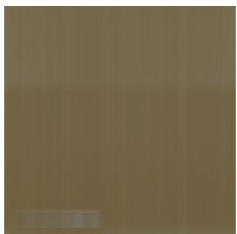

Skill 2

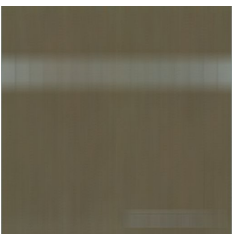

Skill 3

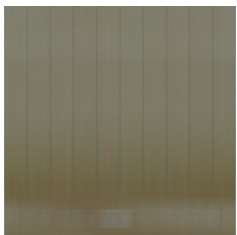

Skill 4

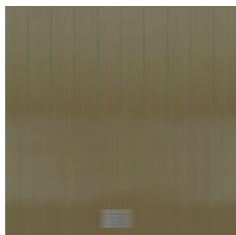

Skill 5

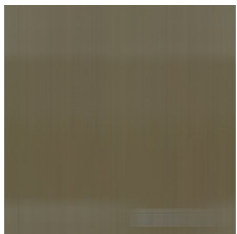

Skill 6

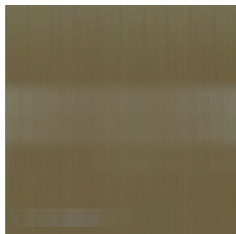

Skill 7

## Jumper

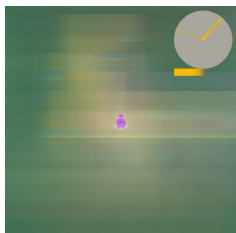

Skill 0

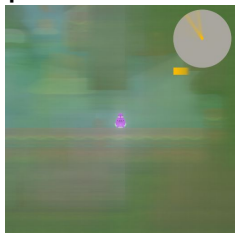

Skill 1

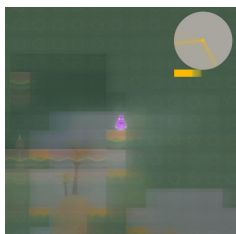

Skill 2

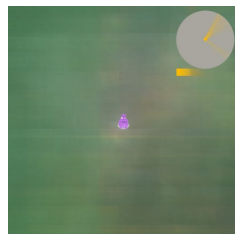

Skill 3

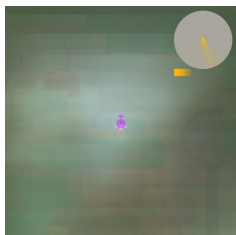

Skill 4

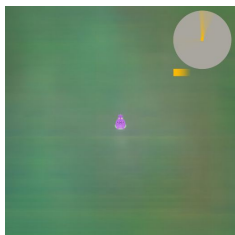

Skill 5

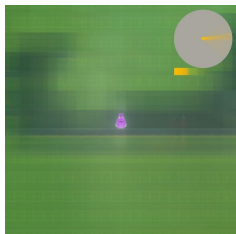

Skill 6

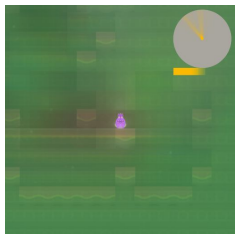

Skill 7

## Ninja

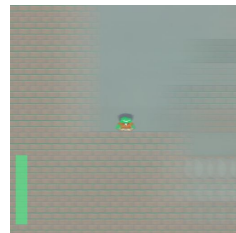

Skill 0

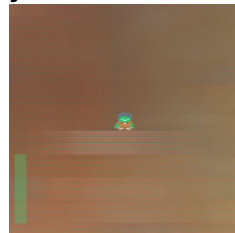

Skill 1

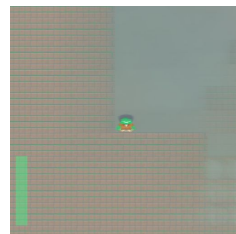

Skill 2

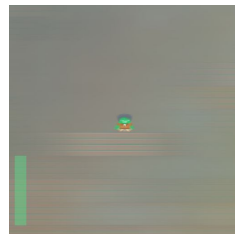

Skill 3

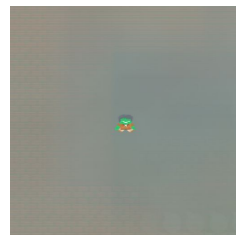

Skill 4

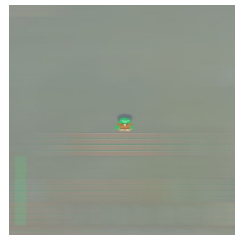

Skill 5

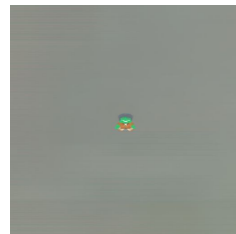

Skill 6

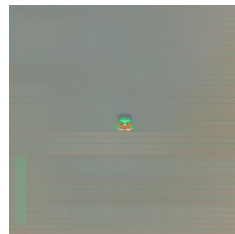

Skill 7
